# Supplementary material for: Naturally Occurring Incompatibilities between Different Culex pipiens pallens Populations as the Basis of Potential Mosquito Control Measures
Source: PubMed Central journal article supplement (PMC3561155; doi:10.1371/journal.pntd.0002030), 2013-01-31
Supplement: pntd.0002030.s005.pdf [file pntd.0002030.s005.pdf]

Table S1 Reciprocal crosses among *Cx. pipiens pallens* field populations

| Cross | Mating Combination*   | Total Egg Rafts | Total Eggs | Total Larvae | Hatching Rate | Comparison | Significance                     |
|-------|-----------------------|-----------------|------------|--------------|---------------|------------|----------------------------------|
| A     | TK ♀ (29) × TK ♂ (29) | 22              | 2788       | 2433         | 0.873 ± 0.028 | A vs. B    | $P < 0.0001$ (t=28.219; df=38)   |
| B     | TK ♀ (29) × WX ♂ (29) | 18              | 2194       | 2            | 0.001 ± 0.001 |            |                                  |
| C     | WX ♀ (25) × WX ♂ (25) | 18              | 2069       | 1799         | 0.856 ± 0.003 | C vs. D    | $P < 0.0001$ (t=34.463; df=37)   |
| D     | WX ♀ (25) × TK ♂ (25) | 21              | 2384       | 14           | 0.005 ± 0.026 |            |                                  |
| E     | TK ♀ (33) × TK ♂ (33) | 25              | 3419       | 3087         | 0.883 ± 0.028 | E vs. F    | $P < 0.0001$ (t=30.290; df=47)   |
| F     | TK ♀ (33) × NJ ♂ (33) | 24              | 3148       | 12           | 0.004 ± 0.003 |            |                                  |
| G     | NJ ♀ (32) × TK ♂ (32) | 31              | 3452       | 13           | 0.004 ± 0.002 | G vs. H    | $P < 0.0001$ (t=-63.584; df=58)  |
| H     | NJ ♀ (32) × NJ ♂ (32) | 29              | 3748       | 3474         | 0.922 ± 0.015 |            |                                  |
| I     | NJ ♀ (33) × NJ ♂ (33) | 31              | 3896       | 3470         | 0.882 ± 0.019 | I vs. J    | NS (t=-0.724; df=59; $P=0.472$ ) |
| J     | NJ ♀ (33) × WX ♂ (33) | 30              | 3954       | 3577         | 0.898 ± 0.011 |            |                                  |
| K     | WX ♀ (32) × NJ ♂ (32) | 23              | 3178       | 2664         | 0.831 ± 0.034 | K vs. L    | NS (t=-0.570; df=44; $P=0.571$ ) |
| L     | WX ♀ (32) × WX ♂ (32) | 23              | 3509       | 3072         | 0.859 ± 0.036 |            |                                  |

\* Numbers in parentheses refer to the numbers of mosquitoes used in the respective combinations.

For each cross, hatching rate value is expressed as mean ± standard error. NS, nonsignificant  $P$ -value.
