# Supplementary material for: Naturally Occurring Incompatibilities between Different Culex pipiens pallens Populations as the Basis of Potential Mosquito Control Measures
Source: PubMed Central journal article supplement (PMC3561155; doi:10.1371/journal.pntd.0002030), 2013-01-31
Supplement: pntd.0002030.s007.pdf [file pntd.0002030.s007.pdf]

Table S3 Mating combinations of TK and WX females with both cognate and increasing number of incompatible males

| Cross | Mating combination*                    | Total egg rafts | Total Eggs | Total larvae | Hatching Rate | Comparison | Significance                   |
|-------|----------------------------------------|-----------------|------------|--------------|---------------|------------|--------------------------------|
| M     | TK ♀ (31) × No ♂ (0)                   | 5               | 560        | 0            | 0.000±0.000   |            |                                |
| N     | TK ♀ (31) × TK ♂ (31)                  | 26              | 3753       | 3304         | 0.861±0.020   |            |                                |
| O     | TK ♀ (31) × [TK ♂ (31) + WX ♂ (31)]    | 31              | 4830       | 830          | 0.211±0.071   | O vs. N    | $P < 0.0001$ (t=-8.135 df=55)  |
| P     | TK ♀ (31) × [TK ♂ (31) + 3xWX ♂ (93)]  | 30              | 4521       | 198          | 0.063±0.039   | P vs. N    | $P < 0.0001$ (t=-17.483 df=54) |
| Q     | TK ♀ (31) × WX ♂ (31)                  | 30              | 4668       | 19           | 0.004±0.003   | Q vs. N    | $P < 0.0001$ (t=-44.891 df=54) |
| R     | WX ♀ (46) × No ♂ (0)                   | 8               | 920        | 0            | 0.000±0.000   |            |                                |
| S     | WX ♀ (46) × WX ♂ (46)                  | 37              | 5061       | 4616         | 0.903±0.013   |            |                                |
| T     | WX ♀ (46) × [WX ♂ (46) + TK ♂ (46)]    | 43              | 5521       | 3341         | 0.607±0.066   | T vs. S    | $P < 0.0001$ (t=-4.142 df=78)  |
| U     | WX ♀ (46) × [WX ♂ (46) + 3xTK ♂ (138)] | 36              | 5242       | 2256         | 0.407±0.077   | U vs. S    | $P < 0.0001$ (t=-6.49 df=71)   |
| V     | WX ♀ (46) × TK ♂ (46)                  | 39              | 5927       | 9            | 0.001±0.001   | V vs. S    | $P < 0.0001$ (t=-73.844 df=74) |

\* Numbers in parentheses refer to the numbers of mosquitoes used in the respective combinations.

For each cross, hatching rate value is expressed as mean± standard error. NS, nonsignificant  $P$ -value.
