# Supplementary material for: Naturally Occurring Incompatibilities between Different Culex pipiens pallens Populations as the Basis of Potential Mosquito Control Measures
Source: PubMed Central journal article supplement (PMC3561155; doi:10.1371/journal.pntd.0002030), 2013-01-31
Supplement: pntd.0002030.s009.pdf [file pntd.0002030.s009.pdf]

Table S5 Mating combinations of F1 offspring of TK and WX crosses

| Cross | Mating combination*                                          | Total egg rafts | Total Eggs | Total larvae | Hatching Rate | Comparison | Significance                |
|-------|--------------------------------------------------------------|-----------------|------------|--------------|---------------|------------|-----------------------------|
| D1    | F1 <sub>(WX♀×TK♂)</sub> ♀ (7)× TK♂ (7)                       | 7               | 1072       | 1            | 0.001±0.001   | D1 vs. D2  | P<0.0001(t=-28.098 df=10)   |
| D2    | F1 <sub>(WX♀×TK♂)</sub> ♀ (7)× WX♂ (7)                       | 5               | 900        | 835          | 0.922±0.040   | D2 vs. D3  | NS (t=0.055 df=8 P=0.958)   |
| D3    | F1 <sub>(WX♀×TK♂)</sub> ♀ (7)× F1 <sub>(WX♀×TK♂)</sub> ♂ (7) | 5               | 779        | 716          | 0.919±0.007   | D1 vs. D3  | P<0.0001(t=-165.351 df=10)  |
| D4    | TK♀ (10) × TK♂ (10)                                          | 7               | 1091       | 1029         | 0.940±0.014   | D4 vs. D5  | P<0.0001(t=68.104 df=12)    |
| D5    | TK♀ (10) × WX♂ (10)                                          | 7               | 1046       | 0            | 0.000±0.000   | D5 vs. D6  | NS (t=-0.875 df=14 P=0.396) |
| D6    | TK♀ (10) × F1 <sub>(WX♀×TK♂)</sub> ♂ (10)                    | 9               | 1558       | 3            | 0.002±0.002   | D4 vs. D6  | P<0.0001(t=76.332 df=14)    |
| D7    | WX♀ (10)× TK♂ (10)                                           | 7               | 941        | 10           | 0.009±0.009   | D7 vs. D8  | P<0.0001(t=-27.856 df=13)   |
| D8    | WX♀ (10)× WX♂ (10)                                           | 8               | 1207       | 917          | 0.847±0.027   | D8 vs. D9  | NS (t=-1.382 df=12 P=0.192) |
| D9    | WX♀ (10)× F1 <sub>(WX♀×TK♂)</sub> ♂ (10)                     | 6               | 851        | 763          | 0.898±0.022   | D7 vs. D9  | P<0.0001(t=-39.975 df=11)   |
| B1    | F1 <sub>(TK♀×WX♂)</sub> ♀ (9)× TK♂ (9)                       | 7               | 1314       | 1194         | 0.908±0.025   | B1 vs. B2  | P<0.0001(t=42.365 df=14)    |
| B2    | F1 <sub>(TK♀×WX♂)</sub> ♀ (9)× WX♂ (9)                       | 9               | 1558       | 0            | 0.000±0.000   | B1 vs. B3  | NS( t=0.2 df=13 P=0.845)    |
| B3    | F1 <sub>(TK♀×WX♂)</sub> ♀ (9)× F1 <sub>(TK♀×WX♂)</sub> ♂ (9) | 8               | 1453       | 1316         | 0.897±0.126   | B2 vs. B3  | P<0.0001(t=-21.417 df=15)   |
| B4    | TK♀ (9)× TK♂ (9)                                             | 6               | 793        | 739          | 0.916±0.026   | B4 vs. B5  | P<0.0001( t=38.000 df=11)   |
| B5    | TK♀ (9)× WX♂ (9)                                             | 7               | 888        | 0            | 0.000±0.000   | B4 vs. B6  | NS( t=0.713 df=9 P=0.494)   |
| B6    | TK♀ (9)× F1 <sub>(TK♀×WX♂)</sub> ♂ (9)                       | 5               | 818        | 712          | 0.872±0.060   | B5 vs. B6  | P<0.0001( t=-17.425 df=10)  |
| B7    | WX♀ (9)× TK♂ (9)                                             | 7               | 970        | 2            | 0.002±0.001   | B7 vs. B8  | P<0.0001(t=-57.272 df=11)   |
| B8    | WX♀ (9)× WX♂ (9)                                             | 6               | 864        | 793          | 0.921±0.017   | B8 vs. B9  | P<0.0001(t=52.845 df=10)    |
| B9    | WX♀ (9)× F1 <sub>(TK♀×WX♂)</sub> ♂ (9)                       | 6               | 622        | 1            | 0.001±0.001   | B7 vs. B9  | NS(t=0.636 df=11 P=0.538)   |

\* Numbers in parentheses refer to the numbers of mosquitoes used in the respective combinations.

For each cross, hatching rate value is expressed as mean± standard error. NS, nonsignificant P-value.
