# Supplementary material for: Naturally Occurring Incompatibilities between Different Culex pipiens pallens Populations as the Basis of Potential Mosquito Control Measures
Source: PubMed Central journal article supplement (PMC3561155; doi:10.1371/journal.pntd.0002030), 2013-01-31
Supplement: pntd.0002030.s010.pdf [file pntd.0002030.s010.pdf]

Table S6 Crosses of tetracycline-treated and untreated WX and TK populations

| Cross | Mating Combination*                 | Total Egg Rafts | Total Eggs | Total Larvae | Hatching Rate | Comparison  | Significance                   |
|-------|-------------------------------------|-----------------|------------|--------------|---------------|-------------|--------------------------------|
| TET-1 | WX ♀ (8) × TK <sub>tet</sub> ♂ (5)  | 8               | 781        | 701          | 0.905±0.025   | TET-1:TET-2 | $P < 0.0001$ (t=33.746 df=13)  |
| TET-2 | WX ♀ (8) × TK ♂ (5)                 | 7               | 688        | 0            | 0.000±0.000   | TET-1:TET-3 | NS (t=0.401 df=12 $P=0.558$ )  |
| TET-3 | WX ♀ (8) × WX ♂ (5)                 | 6               | 589        | 508          | 0.874±0.051   |             |                                |
| TET-4 | TK ♀ (15) × WX <sub>tet</sub> ♂ (3) | 7               | 811        | 675          | 0.834±0.044   | TET-4:TET-5 | $P < 0.0001$ (t=20.150 df=13)  |
| TET-5 | TK ♀ (15) × WX ♂ (3)                | 8               | 828        | 0            | 0.000±0.000   | TET-4:TET-6 | NS (t=-0.736 df=13 $P=0.758$ ) |
| TET-6 | TK ♀ (15) × TK ♂ (3)                | 8               | 872        | 763          | 0.857±0.057   |             |                                |

\* Numbers in parentheses refer to the numbers of mosquitoes used in the respective combinations.

For each cross, hatching rate value is expressed as mean± standard error. NS, nonsignificant  $P$ -value.
