# Supplementary material for: Naturally Occurring Incompatibilities between Different Culex pipiens pallens Populations as the Basis of Potential Mosquito Control Measures
Source: PLoS Negl Trop Dis. 2013 Jan 31;7(1):e2030. doi: 10.1371/journal.pntd.0002030 (PMC3561155; doi:10.1371/journal.pntd.0002030)
Supplement: Table S2 — Second round mating combinations of females retrieved from incompatible crosses. (PDF) [file pntd.0002030.s006.pdf]

Table S2 Second round mating combinations of females retrieved from incompatible crosses

| Cross | Mating combination *                            | Total egg rafts | Total Eggs | Total larvae | Hatching Rate | Comparison | Significance               |
|-------|-------------------------------------------------|-----------------|------------|--------------|---------------|------------|----------------------------|
| 1     | ♀ retrieved from (TK ♀ × WX ♂) (13) × TK ♂ (13) | 10              | 1022       | 1            | 0.001±0.001   | 1 vs. 2    | NS(t=-1.013,df=18,P=0.324) |
| 2     | ♀ retrieved from (TK ♀ × WX ♂) (13) × No ♂ (0)  | 10              | 1101       | 5            | 0.005±0.004   |            |                            |
| 3     | ♀ retrieved from (WX ♀ × TK ♂) (9) × WX ♂ (9)   | 4               | 388        | 0            | 0.000±0.000   | 3 vs. 4    | NS(t=-1.0,df=6,P=0.356)    |
| 4     | ♀ retrieved from (WX ♀ × TK ♂) (9) × No ♂ (0)   | 4               | 372        | 1            | 0.003±0.003   |            |                            |

\* Numbers in parentheses refer to the numbers of mosquitoes used in the respective combinations.  
For each cross, hatching rate value is expressed as mean± standard error. NS, nonsignificant *P*-value.
