# Supplementary material for: Naturally Occurring Incompatibilities between Different Culex pipiens pallens Populations as the Basis of Potential Mosquito Control Measures
Source: PLoS Negl Trop Dis. 2013 Jan 31;7(1):e2030. doi: 10.1371/journal.pntd.0002030 (PMC3561155; doi:10.1371/journal.pntd.0002030)
Supplement: Table S4 — Second round mating combinations of females retrieved from mixed male populations. (PDF) [file pntd.0002030.s008.pdf]

Table S4 Second round mating combinations of females retrieved from mixed male populations

| Cross | Mating combination*                                        | Total egg rafts | Total Eggs | Total larvae | Hatching Rate | Comparison | Significance                   |
|-------|------------------------------------------------------------|-----------------|------------|--------------|---------------|------------|--------------------------------|
| 9     | ♀ retrieved from (TK ♀ × No ♂) (11) × TK ♂ (11)            | 11              | 1371       | 873          | 0.630±0.113   | 9 vs. 10   | P<0.05 (t=2.289 df=11 P=0.043) |
| 10    | ♀ retrieved from (TK ♀ × No ♂) (11) × No ♂ (0)             | 2               | 194        | 0            | 0.000±0.000   |            |                                |
| 11    | ♀ retrieved from (TK ♀ × TK ♂) (11) × TK ♂ (11)            | 7               | 832        | 736          | 0.860±0.038   | 11 vs. 12  | NS(t=-0.694 df=15 P=0.498)     |
| 12    | ♀ retrieved from (TK ♀ × TK ♂) (11) × No ♂ (0)             | 10              | 1054       | 936          | 0.884±0.011   |            |                                |
| 13    | ♀ retrieved from [TK ♀ × (TK ♂ + WX ♂)] (14) × TK ♂ (14)   | 13              | 1633       | 293          | 0.190±0.101   | 13 vs. 14  | NS(t=0.407 df=24 P=0.687)      |
| 14    | ♀ retrieved from [TK ♀ × (TK ♂ + WX ♂)] (14) × No ♂ (0)    | 13              | 1701       | 212          | 0.135±0.090   |            |                                |
| 15    | ♀ retrieved from [TK ♀ × (TK ♂ + 3xWX ♂)] (13) × TK ♂ (13) | 13              | 1758       | 1            | 0.0004±0.0004 | 15 vs. 16  | NS(t=-1.142 df=21 P=0.266)     |
| 16    | ♀ retrieved from [TK ♀ × (TK ♂ + 3xWX ♂)] (13) × No ♂ (0)  | 10              | 1298       | 93           | 0.081±0.081   |            |                                |
| 17    | ♀ retrieved from (TK ♀ × WX ♂) (14) × TK ♂ (14)            | 9               | 1137       | 6            | 0.006±0.006   | 17 vs. 18  | NS(=0.882 df=21 P=0.388)       |
| 18    | ♀ retrieved from (TK ♀ × WX ♂) (14) × No ♂ (0)             | 14              | 1595       | 2            | 0.002±0.001   |            |                                |
| 19    | ♀ retrieved from (WX ♀ × No ♂) (20) × WX ♂ (20)            | 7               | 857        | 361          | 0.431±0.157   | 19 vs. 20  | P<0.05 (t=2.750 df=12 P=0.018) |
| 20    | ♀ retrieved from (WX ♀ × No ♂) (20) × No ♂ (0)             | 7               | 782        | 0            | 0.000±0.000   |            |                                |
| 21    | ♀ retrieved from (WX ♀ × WX ♂) (21) × WX ♂ (21)            | 16              | 1969       | 1630         | 0.828±0.025   | 21 vs. 22  | NS(t=-0.083 df=30 P=0.934)     |
| 22    | ♀ retrieved from (WX ♀ × WX ♂) (21) × No ♂ (0)             | 16              | 1806       | 1527         | 0.823±0.043   |            |                                |
| 23    | ♀ retrieved from [WX ♀ × (WX ♂ + TK ♂)] (22) × WX ♂ (22)   | 19              | 2077       | 1136         | 0.493±0.093   | 23 vs. 24  | NS(t=-0.369 df=33 P=0.714)     |
| 24    | ♀ retrieved from [WX ♀ × (WX ♂ + TK ♂)] (22) × No ♂ (0)    | 16              | 1975       | 1085         | 0.544±0.105   |            |                                |
| 25    | ♀ retrieved from [WX ♀ × (WX ♂ + 3xTK ♂)] (21) × WX ♂ (21) | 18              | 2120       | 699          | 0.355±0.096   | 25 vs. 26  | NS(t=-0.357 df=30 P=0.724)     |
| 26    | ♀ retrieved from [WX ♀ × (WX ♂ + 3xTK ♂)] (21) × No ♂ (0)  | 14              | 1771       | 679          | 0.408±0.112   |            |                                |
| 27    | ♀ retrieved from (WX ♀ × TK ♂) (21) × WX ♂ (21)            | 19              | 2304       | 20           | 0.007±0.006   | 27 vs. 28  | NS(t=0.806 df=33 P=0.426)      |
| 28    | ♀ retrieved from (WX ♀ × TK ♂) (21) × No ♂ (0)             | 16              | 2078       | 9            | 0.002±0.002   |            |                                |

\* Numbers in parentheses refer to the numbers of mosquitoes used in the respective combinations.

For each cross, hatching rate value is expressed as mean± standard error. NS, nonsignificant P-value.
